# Supplementary material for: Ag+insertion into 3D hierarchical rose-like Cu1.8Se nanocrystals with tunable band gap and morphology genetic
Source: Royal Society of Chemistry journal article supplement (doi:10.1039/c3nr04923j), 2013-10-28
Supplement: c3nr04923j.pdf [file c3nr04923j.pdf]

# Supporting Information

## Ag<sup>+</sup> Insertation into 3D Hierarchical Rose-like Cu<sub>1.8</sub>Se Nanocrystalline with Tunable Band Gap and Morphology Genetic

Liwei Mi<sup>\*a</sup>, Wutao Wei<sup>a,b</sup>, Zhi Zheng<sup>a</sup>, Guangshan Zhu<sup>c</sup>, Hongwei Hou<sup>a</sup>, Weihua Chen<sup>\*b</sup> and Xinxin Guan<sup>\*b</sup>

<sup>a</sup> Key Laboratory for Micro-Nano Energy Storage and Conversion Materials of Henan Province, Institute of Surface Micro and Nano Materials, Xuchang University, Henan 461000, China

<sup>b</sup> Department of Chemistry, Zhengzhou University, Henan 450001, China

<sup>c</sup> State Key Laboratory of Inorganic Synthesis and Preparative Chemistry, Jilin University, Changchun 130012, China

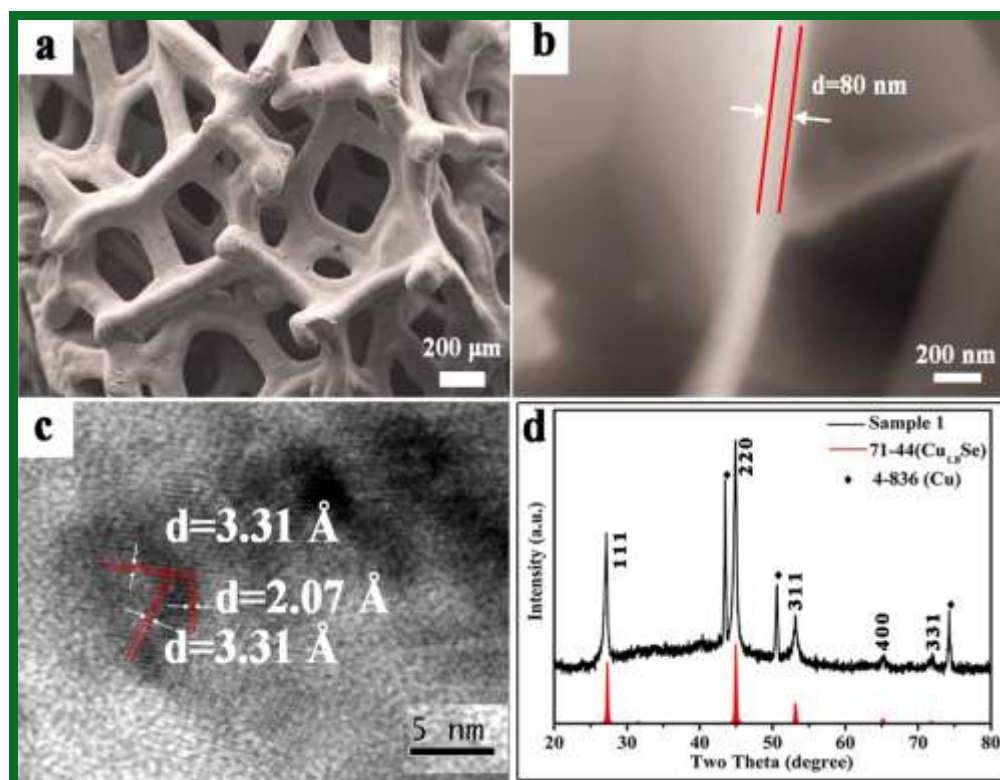

**Figure S1** (a) the SEM image of foam copper, (b) the SEM image of a single nanosheet as the primary building block of Cu<sub>1.8</sub>Se microspheres, (c) the HRTEM image of Sample 1, and (d) the XRD pattern of Sample 1 without any treatment.

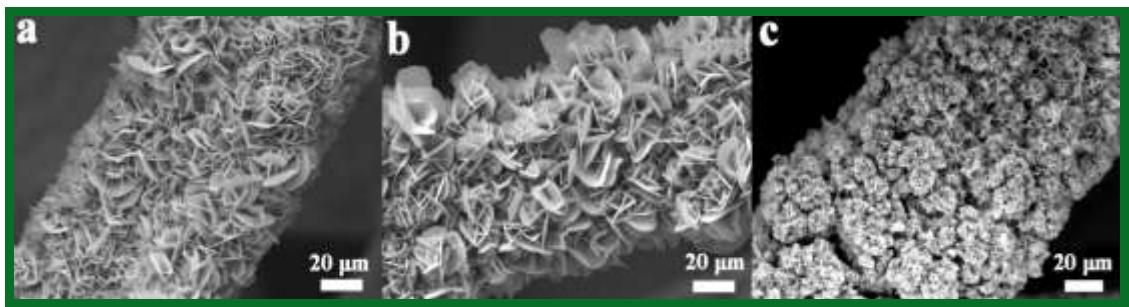

**Figure S2** The SEM images of Sample **4** (a), **5** (b), and **8** (c).

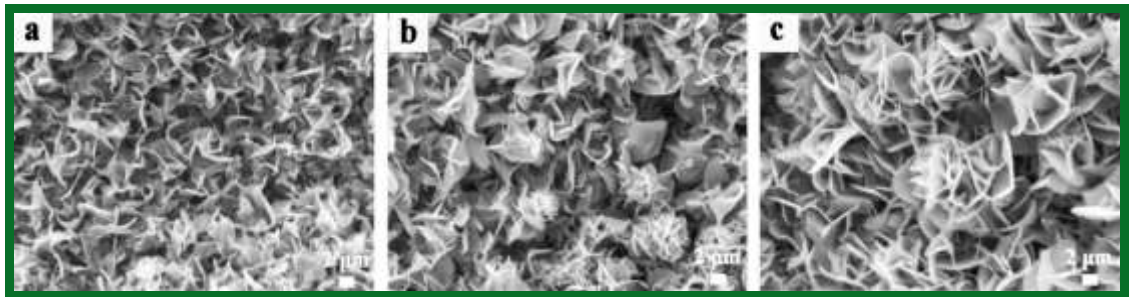

**Figure S3** The SEM images of Sample **10** (a), **11** (b), and **13** (c).

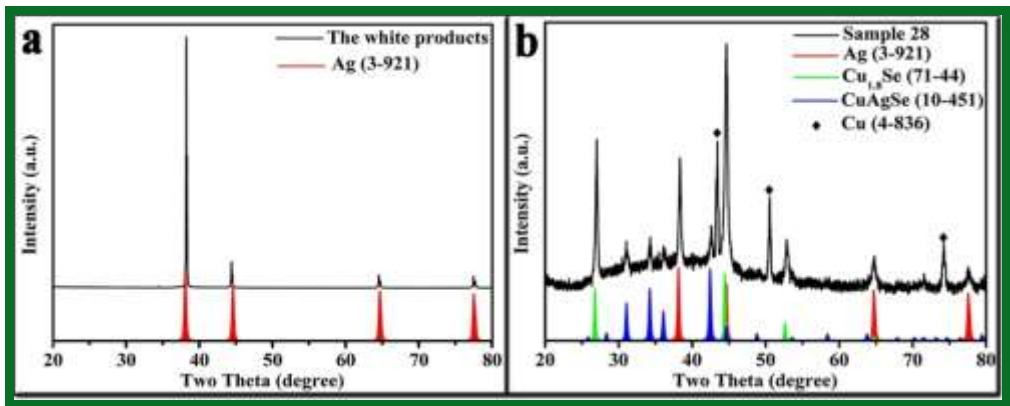

**Figure S4** (a) the XRD pattern of the white product on the surface of Sample **28**. (b) the XRD pattern of Sample **28**.

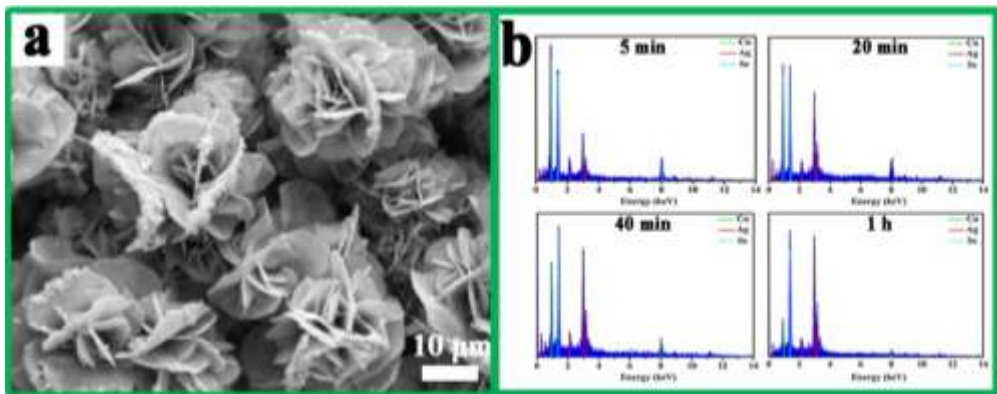

**Figure S5** (a) the SEM image of Sample **27**, (b) the EDS spectra of Sample **24**, **26**, **22** and **27**.

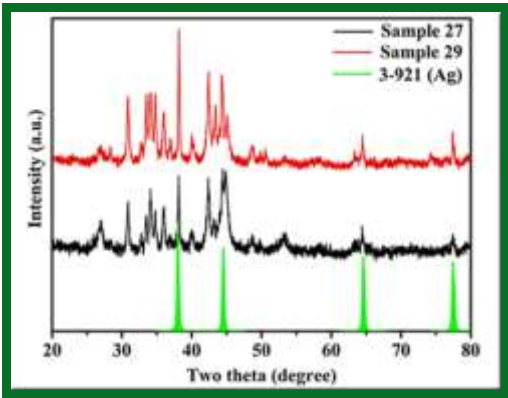

**Figure S6** the XRD pattern of Sample **29** and **27**.
